# Supplementary material
Source: PubMed Central journal article supplement (PMC8935477)
Supplement: NIHMS1785992-supplement-supplementary_material.pdf [file NIHMS1785992-supplement-supplementary_material.pdf]

## Supplemental Tables

**Supplemental Table 1.** List of reagents used in the study.

| Reagent                                                                              | Source                 | Catalog number |
|--------------------------------------------------------------------------------------|------------------------|----------------|
| <sup>14</sup> C-acetate                                                              | Perkin - Elmer         | NEC553250UC    |
| Anti-mouse $\alpha$ -smooth muscle actin ( $\alpha$ SMA, clone: 1A4), Cy3-conjugated | Sigma                  | C6198          |
| Anti-mouse CD68 (clone: FA11)                                                        | BioRad                 | MCA1957        |
| Anti-mouse CD206                                                                     | BioRad                 | MCA2235T       |
| Anti-mouse iNOS                                                                      | Abcam                  | ab3523         |
| Anti-rat IgG, Cy2-labeled, Host: donkey                                              | Jackson ImmunoResearch | 712-225-150    |
| DMEM/F12                                                                             | Gibco                  | 11320-033      |
| Fetal bovine serum (FBS)                                                             | Gibco                  | 10082147       |
| Glucose                                                                              | Gibco                  | A24940-01      |
| Glutamine                                                                            | ThermoFisher           | 25030081       |
| HEPES buffer                                                                         | Gibco                  | 15630-080      |
| LPS from <i>E. coli</i> O111:B4                                                      | Millipore              | 437627         |
| Non-essential amino acids                                                            | Gibco                  | 11140-050      |
| Movat's pentachrome                                                                  | ScyTek Laboratories    | MPS-2          |
| Optimal cutting temperature (OCT)                                                    | Fisher HealthCare      | 4585           |
| RPMI-1640 (+L-glutamine, -D-glucose)                                                 | Gibco                  | 11879-020      |
| Penicillin                                                                           | Gibco                  | 15070-063      |
| PicoGreen reagent                                                                    | Invitrogen             | P11496         |
| ProLong™ Gold Antifade with (DAPI)                                                   | Invitrogen             | P36931         |
| QuantiTect® Reverse Transcription Kit                                                | QIAGEN                 | 205313         |
| Recombinant human interferon- $\gamma$                                               | PeproTech              | 300-02         |
| Recombinant human IL-4                                                               | PeproTech              | 200-04         |
| Recombinant murine interferon- $\gamma$                                              | PeproTech              | 315-05         |
| Recombinant murine IL-4                                                              | PeproTech              | 214-14         |
| Sodium pyruvate                                                                      | Gibco                  | 11360-070      |
| Streptomycin                                                                         | Gibco                  | 15070-063      |
| Thioglycolate                                                                        | Sigma                  | T9032-500G     |
| TRIzol® reagent                                                                      | Invitrogen             | 15596026       |

**Supplemental Table 2.** List of TaqMan primers used for quantitative RT-PCR.

| Species        | Assay name                                                            | Gene full name                                                        | Assay ID       |
|----------------|-----------------------------------------------------------------------|-----------------------------------------------------------------------|----------------|
| Mouse          | <i>Arg1</i>                                                           | Arginase, liver                                                       | Mm00475988_m1  |
|                | <i>Arg2</i>                                                           | Arginase type II                                                      | Mm00477592_m1  |
|                | <i>Cd36</i>                                                           | CD36 molecule                                                         | Mm01135198_m1  |
|                | <i>Chi3l3</i>                                                         | Chitinase-like 3                                                      | Mm00657889_mH  |
|                | <i>Cxcl9</i>                                                          | Chemokine (C-X-C motif) ligand 9                                      | Mm00434946_m1  |
|                | <i>Cxcl10</i>                                                         | Chemokine (C-X-C motif) ligand 10                                     | Mm00445235_m1  |
|                | <i>Il1b</i>                                                           | Interleukin 1                                                         | Mm00434228_m1  |
|                | <i>Nos2</i>                                                           | Nitric oxide synthase 2, inducible                                    | Mm00440502_m1  |
|                | <i>Rn18s</i>                                                          | 18S ribosomal RNA                                                     | Mm03928990_g1  |
|                | <i>Tfrc</i>                                                           | Transferrin receptor                                                  | Mm00441941_m1  |
|                | <i>Tgfb1</i>                                                          | Transforming growth factor, $\beta$ 1                                 | Mm01178820_m1  |
|                | <i>Tnf</i>                                                            | Tumor necrosis factor                                                 | Mm00443258_m1  |
|                | <i>Slc16a1</i>                                                        | Solute carrier family 16 (monocarboxylic acid transporters), member 1 | Mm01306379_m1  |
|                | <i>Slc16a3</i>                                                        | Solute carrier family 16 (monocarboxylic acid transporters), member 3 | Mm00446102_m1  |
| <i>Slc16a7</i> | Solute carrier family 16 (monocarboxylic acid transporters), member 7 | Mm00441442_m1                                                         |                |
| Human          | IL1B                                                                  | Interleukin 1 $\beta$                                                 | Hs01555410_m1  |
|                | NOS2                                                                  | Nitric oxide synthase 2                                               | Hs01075529_m1  |
|                | MRC1                                                                  | Mannose receptor C-type 1                                             | Hs00267207_m1  |
|                | CD163                                                                 | CD163 molecule                                                        | Hs00174705_m1  |
|                | CD68                                                                  | CD68 molecule                                                         | Hs_00154355_m1 |
|                | 18S                                                                   | Eukaryotic 18S rRNA                                                   | Hs99999901_s1  |

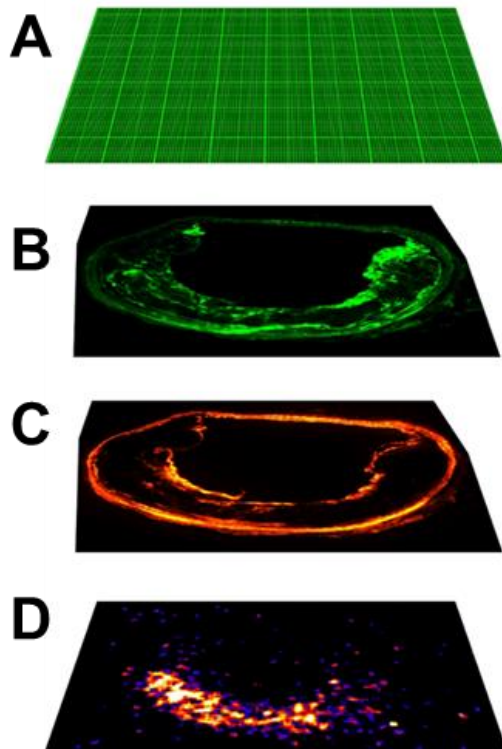

**Supplemental Figure 1: Quantification of CD68<sup>+</sup> and αSMA<sup>+</sup> areas in plaque regions with different levels of <sup>14</sup>C-acetate uptake.** A 5x5 μm grid (A) was applied onto overlaid CD68 and αSMA (B and C) immunostainings and high-resolution autoradiography (D) images. <sup>14</sup>C-acetate intensity data were in each 5x5 μm box were ranked from the lowest to the highest and assigned a quartile (Q1 = lowest, Q4 = highest). CD68<sup>+</sup> and αSMA<sup>+</sup> percent areas were determined in each quartile of <sup>14</sup>C-acetate uptake.

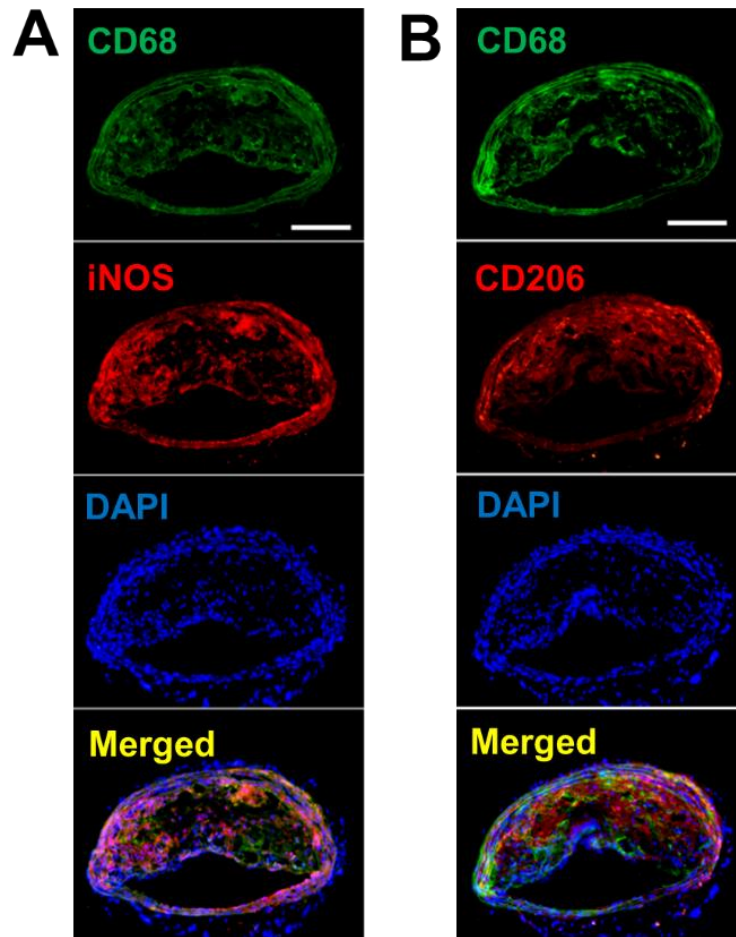

**Supplemental Figure 2: Presence of M1-like and M2-like polarized macrophages in murine brachiocephalic plaques.** Both M1-like macrophages, identified as CD68<sup>+</sup>/iNOS<sup>+</sup> (**A**), and M2-like macrophages, identified as CD68<sup>+</sup>/CD206<sup>+</sup> (**B**), are present in murine brachiocephalic plaques. Scale bars represent 200 μm.

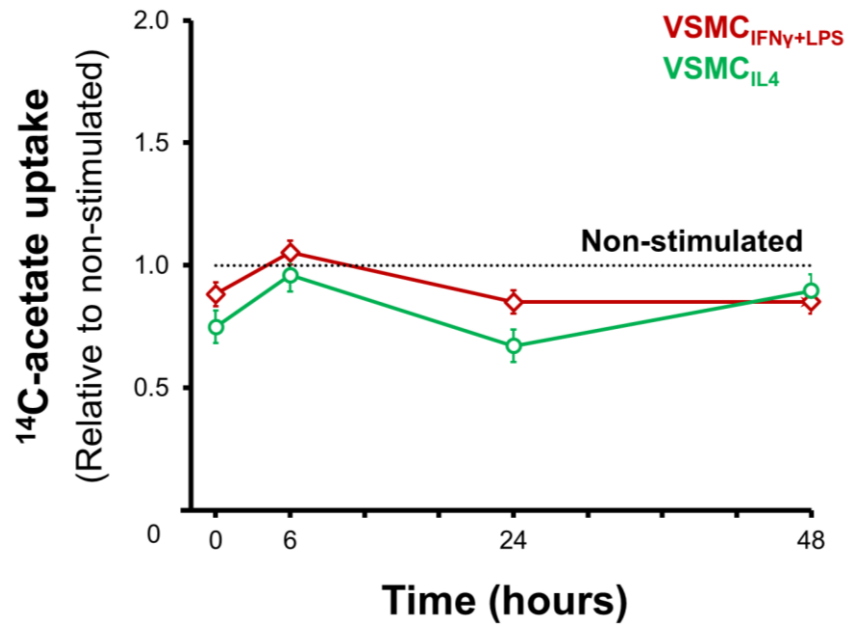

**Supplemental Figure 3: Similar uptake of <sup>14</sup>C-acetate in VSMCs stimulated by IFN- $\gamma$  + LPS or IL-4.** Stimulation of VSMCs with IFN- $\gamma$  + LPS or IL-4 does not significantly alter the uptake of <sup>14</sup>C-acetate over 48 hours.
